# Supplementary material for: Novel design of silicon-based lithium-ion battery anode for highly stable cycling at elevated temperature
Source: Royal Society of Chemistry journal article supplement (doi:10.1039/c4ta05961a), 2014-11-26
Supplement: c4ta05961a1.pdf [file c4ta05961a1.pdf]

**Supplementary Information**

**Novel Design of Silicon-Based Lithium-Ion Battery Anodes for  
Highly Stable Cycling at Elevated Temperature**

Hyungmin Park, Sinho Choi, Sungjun Lee, Gaeun Hwang, Nam-Soon Choi\* and Soojin  
Park\*

*Interdisciplinary School of Green Energy, Ulsan National Institute of Science and  
Technology, Ulsan 689-798, Republic of Korea*

\* Corresponding authors: nschoi@unist.ac.kr and spark@unist.ac.kr

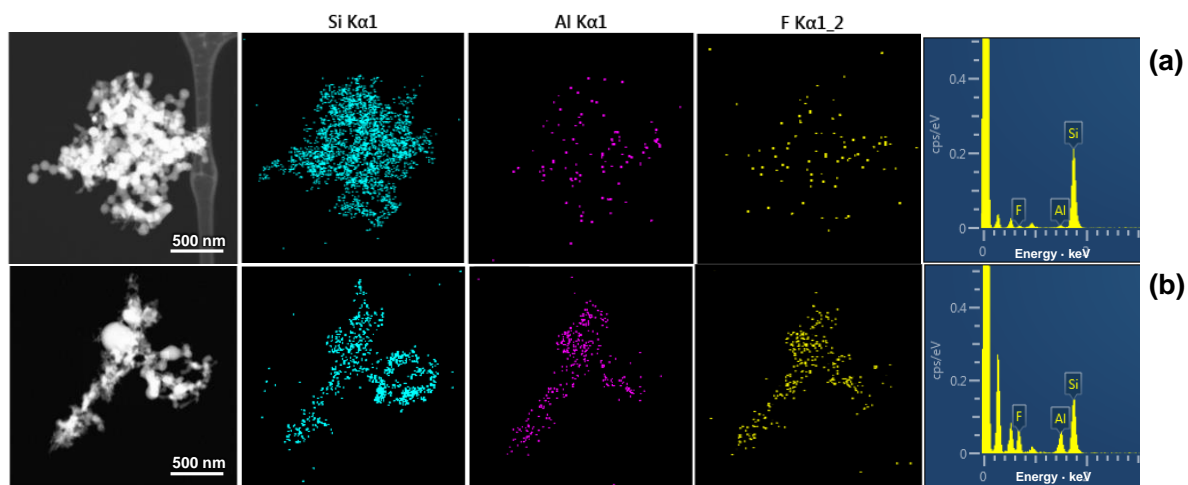

**Figure S1.** EDS measurement of (a) 1.5 wt%  $\text{AlF}_3$  coated Si nanoparticles (b) 7 wt%  $\text{AlF}_3$  coated Si nanoparticles.

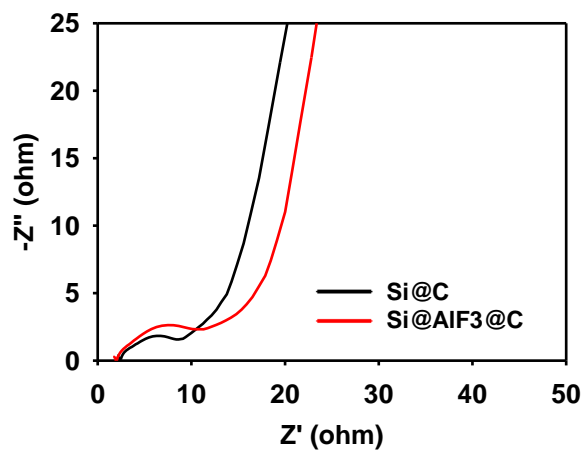

**Figure S2.** EIS measurements of Si@C and Si@ $\text{AlF}_3$ @C electrodes after first cycle.
